# Supplementary material for: Activity and SO2 resistance of amorphous CeaTiOx catalysts for the selective catalytic reduction of NO with NH3: in situ DRIFT studies
Source: Royal Society of Chemistry journal article supplement (doi:10.1039/c6cy00475j), 2016-01-01
Supplement: c6cy00475j1.pdf [file c6cy00475j1.pdf]

## Supplementary Information

### Activity and SO<sub>2</sub> Resistance of Amorphous Ce<sub>a</sub>TiO<sub>x</sub> catalysts for the Selective Catalytic Reduction of NO with NH<sub>3</sub>: In-situ DRIFT studies

Zhiping Zhang, Liqiang Chen, Zhibin Li, Pengying Li, Fulong Yuan, Xiaoyu Niu,\* Yujun Zhu\*

Key Laboratory of Functional Inorganic Material Chemistry, Ministry of Education of the People's  
Republic of China, Heilongjiang University, Harbin 150080, P. R. China.

#### Corresponding Author

Fax (Tel): (+86) 451 8660 9650; E-mail: yujunzhu@hlju.edu.cn (YJ Zhu), niuxiaoyu2000@126.com (XY  
Niu)

#### Catalyst preparation

Crystalline phases Ce-Ti oxides catalysts with the Ce/Ti ratio of 0.3 were prepared by  
impregnation method and sol-gel method which were denoted as Ce<sub>0.3</sub>Ti-CP-1 and Ce<sub>0.3</sub>Ti-  
CP-2, respectively.

#### Impregnation method

Ce<sub>0.3</sub>Ti-CP-1 catalyst with the Ce/Ti ratio of 0.3 was prepared by Impregnation method.  
The commercial TiO<sub>2</sub> (P25) was used as the catalyst support. The catalyst was impregnated  
by incipient wetness with an aqueous solution containing cerium nitrate. The obtained  
mixture was stirred for 3 h, 40 °C rotary evaporateion, then the sample was dried for 12 h at  
105 °C and calcined in muffle furnace for 4 h at 500 °C to obtain the Ce<sub>0.3</sub>Ti-CP-1 catalyst.

#### Sol-gel method

Ce<sub>0.3</sub>Ti-CP-2 catalyst was prepared by a sol-gel method. Briefly, butyl titanate (0.10 mol)

and ethanol (0.50 mol) were mixed under vigorous stirring, and formed a transparent yellow solution. Cerium nitrate (0.03 mol) was dissolved in water (0.60 mol), acetic acid (0.30 mol) and ethanol (0.50 mol), and then added drop wisely to the above yellow solution. The obtained mixture was stirred for 6 h and placed for about three days at room temperature to form gel. Then the gel was dried for 24 h at 105 °C to remove organic solution and then calcined in muffle furnace for 4 h at 700 °C to obtain the  $Ce_{0.3}Ti$ -CP-2 catalyst

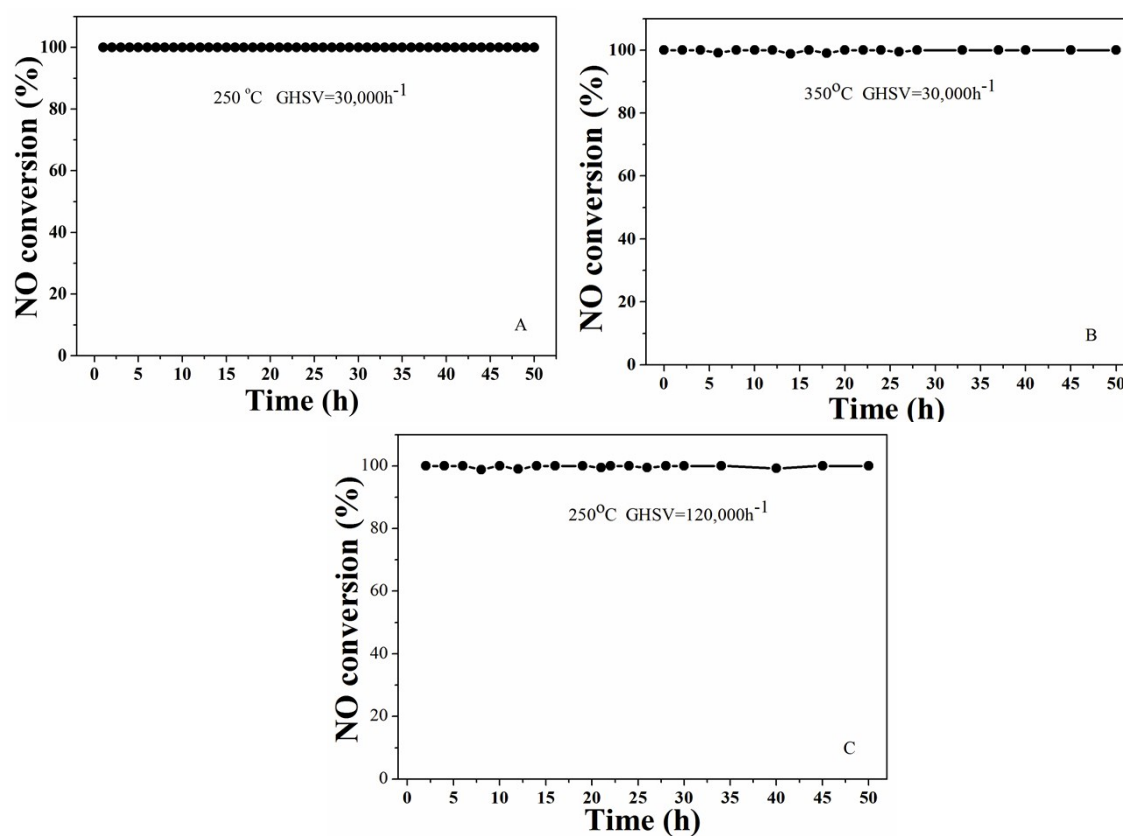

Fig. S1 Activity stability test results of the  $Ce_{0.3}TiO_x$  catalyst. (1000 ppm of NO, 1000 ppm of  $NH_3$ , 3%  $O_2$ , balance  $N_2$ )

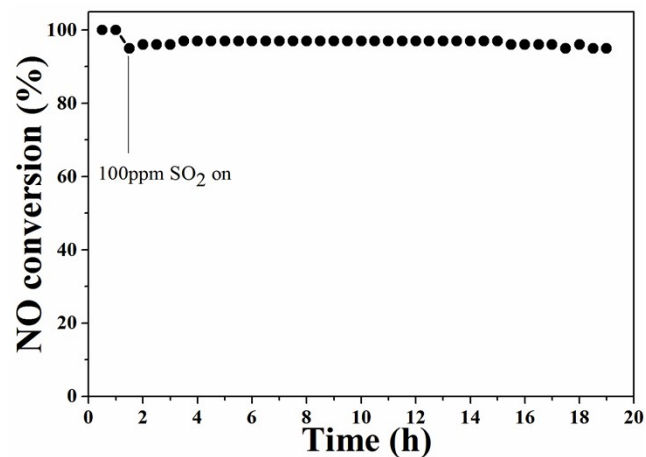

Fig. S2 SO<sub>2</sub> tolerance of the Ce<sub>0.3</sub>TiO<sub>x</sub> catalyst at 250 °C. (1000 ppm of NO, 1000 ppm of NH<sub>3</sub>, 3% O<sub>2</sub>, balance N<sub>2</sub>, GHSV=30,000 h<sup>-1</sup>)

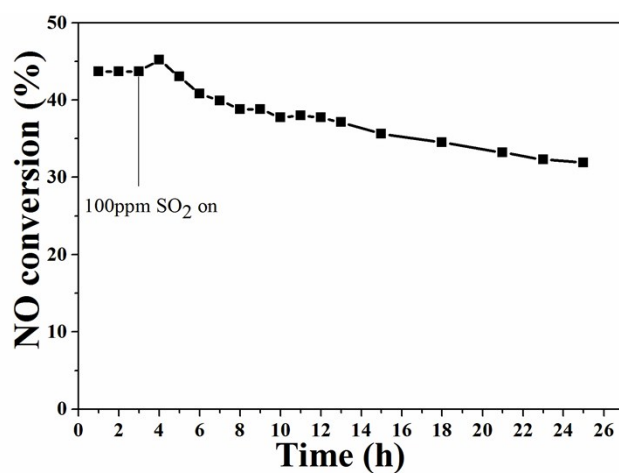

Fig. S3 SO<sub>2</sub> tolerance of the Ce<sub>0.3</sub>TiO<sub>x</sub> catalyst at 150 °C. (1000 ppm of NO, 1000 ppm of NH<sub>3</sub>, 3% O<sub>2</sub>, balance N<sub>2</sub>, GHSV=30,000 h<sup>-1</sup>)

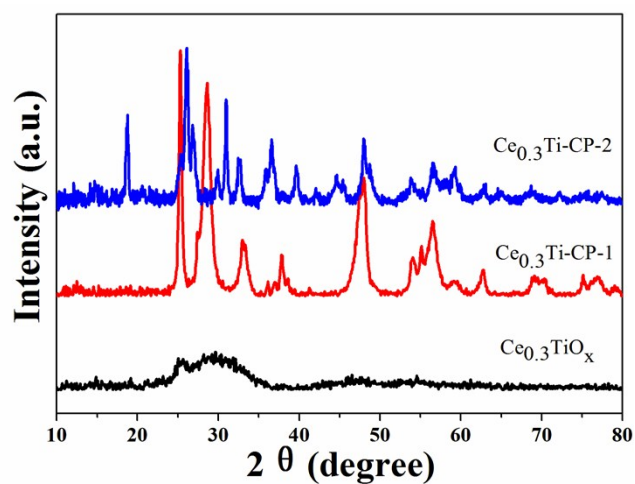

Fig. S4 XRD patterns of the Ce-Ti mixed-oxide catalysts.

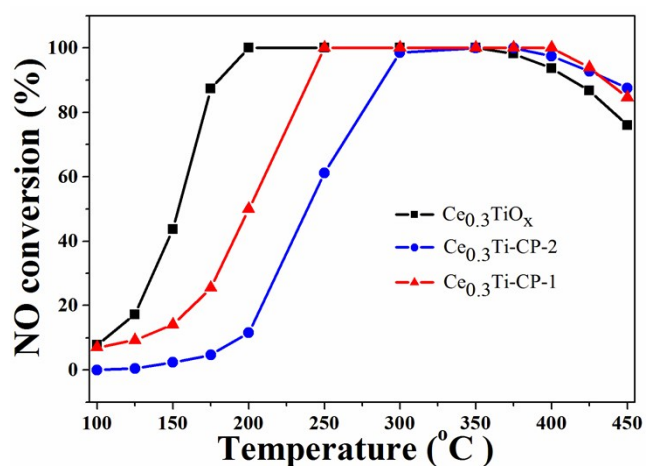

Fig. S5 NH<sub>3</sub>-SCR activity over the Ce-Ti mixed-oxide catalysts (1000 ppm of NO, 1000 ppm of NH<sub>3</sub>, 3% O<sub>2</sub>, balance N<sub>2</sub>, GHSV=30,000 h<sup>-1</sup>).

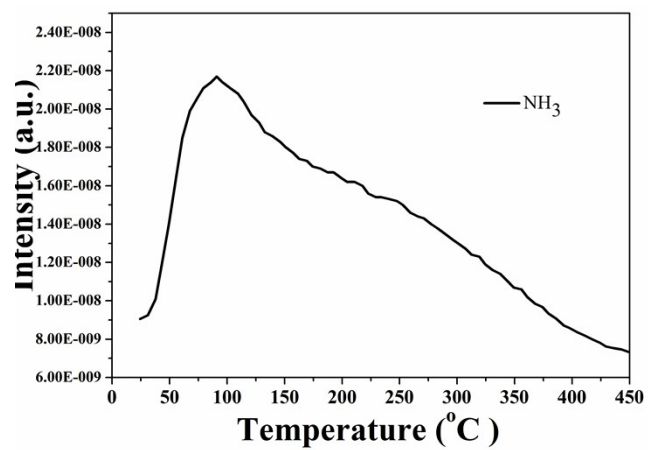

Fig. S6 NH<sub>3</sub>-TPD-MS profiles of Ce<sub>0.3</sub>TiO<sub>x</sub> catalyst.

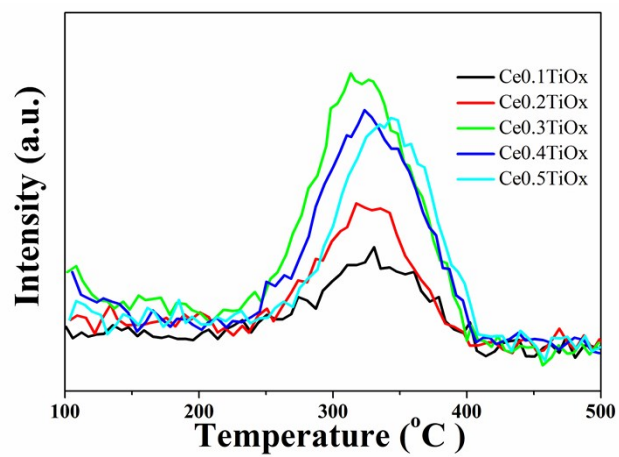

Fig. S7 NO+O<sub>2</sub>-TPD-MS curves of the Ce<sub>a</sub>TiO<sub>x</sub> series catalysts.

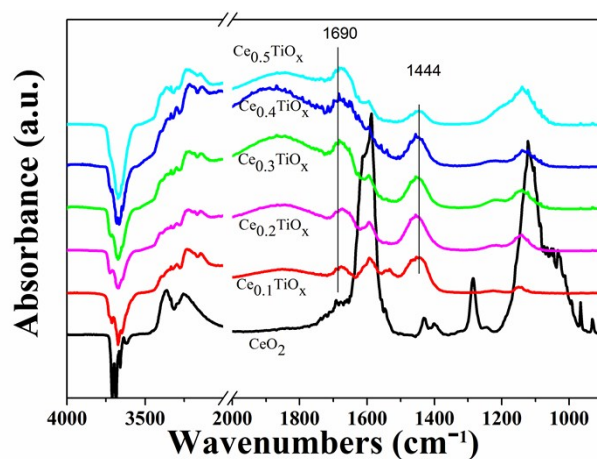

Fig. S8 DRIFTS of the  $\text{NH}_3$  adsorption of the  $\text{Ce}_a\text{TiO}_x$  catalysts at 50 °C.

DRIFTS of the  $\text{NH}_3$  adsorption of was performed over the  $\text{Ce}_a\text{TiO}_x$  catalysts on a Bruker Vector FTIR spectrometer (6700) with in situ diffuse reflectance pool and high sensitivity MCT detector which cooled by liquid  $\text{N}_2$ . The DRIFTS spectra were recorded by accumulating 64 scans with a resolution of  $4 \text{ cm}^{-1}$ . Firstly, catalyst was heated to 300 °C under  $\text{N}_2$  flow  $40 \text{ cm}^3/\text{min}$  for 60 min to remove adsorbed impurities and then cooled to 50 °C. Secondly, the sample spectra was collected by subtracting the background spectrum that was collected under a  $\text{N}_2$  atmosphere. Finally, 0.8%  $\text{NH}_3/\text{N}_2$  was introduced into diffuse reflectance pool at least 30 min to get to adsorption saturation, and the total flow rate of the feed gas was kept  $25 \text{ cm}^3/\text{min}$ .

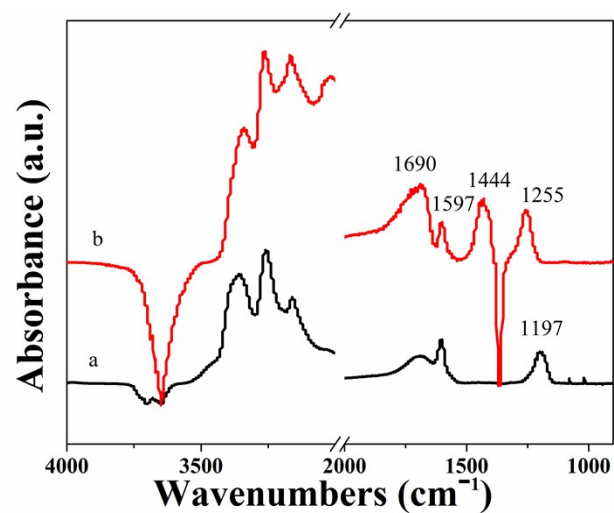

Fig. S9 In situ DRIFTS of the  $\text{Ce}_{0.3}\text{TiO}_x$  catalyst under different conditions (a)  $\text{NH}_3 + \text{O}_2$ -60 min  
(b)  $\text{NH}_3 + \text{O}_2$ -60 min (the sample pretreated by  $\text{SO}_2$ )



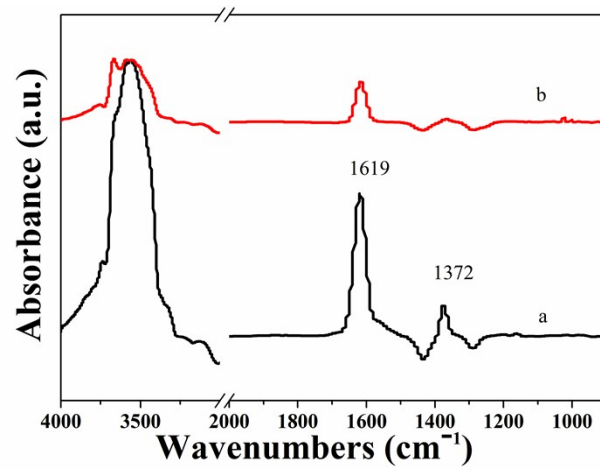

Fig. S10 In situ DRIFTS of the  $\text{Ce}_{0.3}\text{TiO}_x$  catalyst under different conditions (a)  $\text{NO} + \text{O}_2$ -60 min  
(b)  $\text{NO} + \text{O}_2$ -60 min (the sample pretreated by  $\text{SO}_2$ )
